1 **Onchocerciasis-associated epilepsy in the Democratic Republic of**  
2 **Congo: Clinical description and relationship with microfilarial**  
3 **density**

4 Joseph Nelson Siewe Fodjo<sup>1\*</sup>, Michel Mandro<sup>2</sup>, Deby Mukendi<sup>3</sup>, Floribert Tepage<sup>4</sup>, Sonia Menon<sup>1</sup>,  
5 Swabra Nakato<sup>1</sup>, Françoise Nyisi<sup>5</sup>, Germain Abhafule<sup>5</sup>, Deogratias Wonya'rossi<sup>6</sup>, Aimé Anyolito<sup>7</sup>,  
6 Richard Lokonda<sup>3</sup>, An Hotterbeekx<sup>1</sup>, Robert Colebunders<sup>1</sup>

7

8 <sup>1</sup>Global Health Institute, University of Antwerp, Antwerp, Belgium

9 <sup>2</sup>Ministry of Health, Ituri, Democratic Republic of Congo

10 <sup>3</sup>Mont Amba Neuropsychopathologic Center, University of Kinshasa, Democratic Republic of Congo

11 <sup>4</sup>Ministry of Health, Bas-Uélé, Democratic Republic of Congo

12 <sup>5</sup>Centre de Recherche en Maladies Tropicales de l'Ituri, Rethy, Democratic Republic of Congo

13 <sup>6</sup>National Onchocerciasis Control Program, Ituri, Democratic Republic of Congo

14 <sup>7</sup>Hôpital Général de Référence de Logo, Ituri, Democratic Republic of Congo

15

16

17 **Corresponding author:**

18 Joseph Nelson Siewe Fodjo

19 Email: [josephnelson.siewefodjo@uantwerpen.be](mailto:josephnelson.siewefodjo@uantwerpen.be)

20

## 22 **Abstract**

23 **Background:** High epilepsy prevalence and incidence were observed in onchocerciasis-endemic villages  
24 in the Democratic Republic of Congo (DRC). We sought to investigate the clinical characteristics of  
25 onchocerciasis-associated epilepsy (OAE), and the relationship with microfilarial density.

26 **Methods:** In October 2017, ivermectin-naive persons with epilepsy (PWE) were recruited from  
27 onchocerciasis-endemic areas in the Logo health zone in the DRC. Additional PWE were enrolled in the  
28 Aketi health zone, where ivermectin had been distributed annually for 14 years. Past medical history,  
29 clinical characteristics and skin snips for *Onchocerca volvulus* detection were obtained from participants.  
30 Bivariate and multivariable analyses were used to investigate associations with microfilarial density.

31 **Results:** Of the 420 PWE in the Logo health zone, 392 were skin snipped (36.5% positive). Generalized  
32 motor seizures were most frequent (392 PWE, 93.3%), and nodding seizures were reported in 32 (7.6%)  
33 participants. Twelve PWE (3.1%) presented Nakalanga features. More skin snip-positive participants  
34 reported a family history of epilepsy ( $p=0.027$ ). Eighty-one onchocerciasis-infected PWE were recruited in  
35 the Aketi health zone. Positive correlations between seizure frequency and microfilarial density were  
36 observed in Logo (Spearman- $\rho=0.181$ ;  $p=0.0003$ ) and Aketi (Spearman- $\rho=0.228$ ;  $p=0.046$ ). In the  
37 multivariable analysis which adjusted for age, gender and previous anti-epileptic drug use, factors  
38 associated with high seizure frequency included: high microfilarial density (RR=1.004, 95% CI: 1.002–  
39 1.007;  $p<0.001$ ), history of nodding seizures (RR=3.852, 95% CI: 2.926–5.082;  $p<0.001$ ) and shorter  
40 duration of epilepsy (RR=0.948, 95% CI: 0.928–0.968;  $p<0.001$ ). In Aketi, previous ivermectin use was  
41 associated with reduced seizures (RR=0.69, 95% CI: 0.58–0.83;  $p<0.001$ ).

42 **Conclusion:** In onchocerciasis-endemic regions in the DRC, a wide spectrum of seizures was observed.  
43 Nodding seizures, Nakalanga features, and a positive association between microfilarial density and seizures  
44 suggest a high OAE prevalence in the study villages, requiring a double management strategy: treatment  
45 with anti-epileptic drugs and stronger onchocerciasis elimination programs.

46

47 **Author summary**

48 Several epidemiological surveys suggest that onchocerciasis (a disease resulting from an infection with the  
49 parasite *Onchocerca volvulus*) is a cause of epilepsy. We conducted a study to describe the clinical  
50 characteristics of persons with epilepsy (PWE) living in onchocerciasis-endemic villages in the Democratic  
51 Republic of Congo. Our study revealed that the frequency of seizures increased with increasing number of  
52 *O. volvulus* microfilariae detected in skin snips of participants. A wide spectrum of seizures was observed,  
53 including generalized tonic-clonic seizures, absence seizures, and focal seizures. Growth retardation and  
54 household clustering of PWE were common. Specific clinical presentations such as nodding seizures and  
55 Nakalanga features were encountered. These results suggest a high prevalence of onchocerciasis-associated  
56 epilepsy (OAE) in the study villages.

## 57 **Introduction**

58 As early as the 1930s, onchocerciasis was already suspected to cause seizures [1]. A meta-analysis has  
59 reported a 0.4% increase in epilepsy prevalence, for every 10% increase in onchocerciasis prevalence [2].  
60 Today, there is increasing evidence that onchocerciasis is a risk factor for epilepsy [3–6] and that proper  
61 onchocerciasis elimination strategies can reduce the incidence of onchocerciasis-associated epilepsy (OAE)  
62 [7]. However, the physiopathology explaining how *Onchocerca volvulus* (the parasite responsible for the  
63 clinical manifestations of onchocerciasis) may cause seizures remains unclear.  
64 Recent studies in the Democratic Republic of Congo (DRC) have revealed a high epilepsy prevalence in  
65 hyper-endemic onchocerciasis foci, particularly where control measures are sub-optimal and transmission  
66 is ongoing [8–11]. Although specific phenotypic features of OAE such as the nodding and Nakalanga  
67 syndromes have already been reported in the DRC [9], the full clinical spectrum of OAE in the DRC  
68 remains unknown. In a bid to further elucidate the association between epilepsy and onchocerciasis, a  
69 randomized clinical trial evaluating the effect of ivermectin on the frequency of seizures in PWE living in  
70 the Logo health zone was initiated in October 2017 [12] (Trial Registration Number NCT03052998;  
71 available at: [www.clinicaltrials.gov](http://www.clinicaltrials.gov)). During the recruitment phase of this trial, all consenting PWE were  
72 examined and skin snipped to assess eligibility criteria. This paper describes the clinical features observed  
73 in ivermectin-naïve PWE encountered during the trial. Additional data to investigate the relationship  
74 between seizures and infection with *O. volvulus* were obtained from the Aketi health zone, another hyper-  
75 endemic onchocerciasis focus in the DRC with high epilepsy prevalence [10].

76

## 77 **Methods**

### 78 **Study design**

79 We carried out a cross-sectional, descriptive study of persons with epilepsy in the Democratic Republic of  
80 Congo.

## 81 **Study sites**

82 The study was carried out in two health zones in the DRC, namely Logo (in the Ituri province) and Aketi  
83 (in the Bas-Uélé province). In the Logo health zone, five onchocerciasis-endemic health areas where  
84 community directed treatment with ivermectin (CDTI) had never been implemented were selected: Draju,  
85 Kanga, Tedheja, Ulyeko and Wala. In the Aketi health zone, the study sites had already benefited from 14  
86 years of CDTI and included Wela, Makoko, and Aketi rural town. The ecology and setting was similar in  
87 all study sites; these were essentially rural communities, with several fast-flowing rivers providing suitable  
88 breeding grounds for the blackflies (*Simulium spp*), vectors of *O. volvulus*. The main economic activity of  
89 the residents was farming.

90

## 91 **Study procedures**

### 92 **In the Logo Health zone**

93 This study was conducted within the scheme of a wide program launched in October 2017, aiming to treat  
94 all the PWE in the health zone, including a clinical trial investigating the effect of ivermectin on seizures  
95 [12]. Prior to the start of the study, local authorities were contacted and the study was explained to them in  
96 detail. After obtaining their collaboration, we proceeded to recruit participants using a community-based  
97 approach. Massive sensitization was carried out in the target villages, inviting persons known to have  
98 epilepsy to spontaneously report to the mobile clinics set up by the research team at the health centers.  
99 Additional potential participants were referred to the clinic by community health workers who had been  
100 trained by the research team to screen persons suspected to have epilepsy in their respective villages.

101 All persons suspected to have epilepsy who reported to the mobile clinics were briefed on the study  
102 objectives and procedures in the local language (*Alur*), and informed consent was provided by the  
103 participant and/or the caretaker. Upon confirmation of the epilepsy diagnosis, PWE were further  
104 interviewed and examined by a neurologist (DM) or a medical doctor trained in epilepsy (JNSF, MM, AA,  
105 RC). Participants' weight was measured using a weighing scale, and their heights obtained with a  
106 stadiometer. Information was collected on seizure semiology, seizure frequency, past medical history,

107 antiepileptic treatment history and family history of epilepsy. Cognitive and behavioural symptoms were  
108 grossly assessed by investigating if the participant was coherent in speech, obedient to orders or displayed  
109 any unexplained aggressive attitudes and/or wandering episodes.

110 Two approaches were used to assess growth retardation among our participants. For PWE below 20 years,  
111 the World Health Organization (WHO) height-for-age Z-scores were used, and any participant whose  
112 height was found below -2Z was considered to be growth retarded [13]. For PWE aged 20 years and above,  
113 the mean height of an adult residing in the DRC was retrieved from literature as being  $157.4 \pm 7.56$  cm  
114 (only women's height was available) [14]. We therefore adopted  $157.4 - 7.6 = 149.8$  cm, as the cut-off  
115 height under which adult participants were considered to be growth retarded.

116 Onchocerciasis was diagnosed in two ways. Participants were initially tested for Ov16 antibodies using  
117 rapid diagnostic tests (Ov16 RDT, Standard diagnostics, Inc., Yongin-si, Gyeonggi-do, Korea). Thereafter,  
118 two skin snip samples were collected from each participant for the microscopic detection of *O. volvulus*  
119 microfilariae (mf). All relevant clinical and laboratory information was collected on paper and later entered  
120 in computers using the REDCap platform (<https://www.project-redcap.org/>), a secure web-based electronic  
121 database. The collected data was extracted and analyzed.

## 122 **In the Aketi Health Zone**

123 In January 2018, our research team recruited PWE in Wela, Makoko and Aketi rural town just before the  
124 yearly distribution of ivermectin. Community health workers and local health personnel referred suspected  
125 cases of epilepsy to a physician (FT) for confirmation. Skin snips were collected from confirmed PWE and  
126 examined for mf. The sociodemographic information, history of previous ivermectin and anti-epileptic drug  
127 use as well as seizure frequencies were obtained from participants with positive skin snips. A detailed  
128 clinical examination was not done for PWE in Aketi, because the main research objective in this health  
129 zone was to evaluate seizure frequency and mf density among PWE prior to ivermectin treatment, and to  
130 determine their response to the treatment. All collected data was entered in Microsoft Excel 2016  
131 spreadsheets.

## 132 **Epilepsy diagnosis and seizure classification**

133 PWE were diagnosed in a two-step approach. Firstly, suspected cases were identified by administering a 5-  
134 item validated questionnaire [15]. Any individual who answered affirmatively to at least one question was  
135 further clerked and examined by a neurologist or a physician with training in epilepsy. Epilepsy diagnosis  
136 was confirmed according to the 2014 International League Against Epilepsy (ILAE) operational definition:  
137 two or more unprovoked seizures with at least 24 hours separating the two events [16]. All reported seizures  
138 were classified following the ILAE 2017 nomenclature [17], and the evaluation of the seizure frequency  
139 included all diagnosed seizure types. Previously suggested criteria were applied to identify OAE [7].

## 140 **Detection of *Onchocerca volvulus* microfilariae**

141 Skin snips were taken from the left and right iliac crests of participants using a sterile Holtz corneo-scleral  
142 punch (2mm) to investigate infection with *O. volvulus*. The collected skin snips were incubated for 24 hours  
143 in isotonic saline in a flat-bottomed microtiter plate. The mf that emerged were counted using an inverted  
144 microscope, and the average count for both skin snips from each participant was calculated. Mf densities  
145 were expressed as mf/skin snip. The same experienced laboratory technician (GA) examined the skin snips  
146 from all study sites.

## 147 **Data analysis**

148 Data was analysed in Rstudio version 1.1.456. A Shapiro-Wilk test was done and showed that the  
149 continuous variables were not normally distributed. Therefore, continuous variables were expressed as  
150 median and interquartile range (IQR) and compared across groups (*O. volvulus*-infected vs uninfected)  
151 using the Wilcoxon rank sum test. As for categorical data, they were expressed as proportions and compared  
152 using the Chi-square test. The Spearman rho was used to test for correlations. A generalized linear model  
153 fitted with a Poisson distribution was used to investigate the factors associated with seizure frequency in  
154 the study participants. Selected variables including age, sex, burn scars, and mf density [4], as well as  
155 covariates with a p-value less than 0.2 during bivariate analysis with seizure frequency [18], were included  
156 in the final model. Any p-value less than 0.05 was considered to be statistically significant.

157 **Ethical considerations**

158 Ethical approval for the study was obtained from the ethical committee of the School of Public Health of  
159 the University of Kinshasa in the DRC (Approval number: ESP/CE/013/2018) and the ethical committee  
160 of the University of Antwerp (Registration number: B300201733350). All PWE willingly participated in  
161 the study and provided signed/thumb-printed informed consents. The identity and information of  
162 participants was kept confidential. In collaboration with the non-governmental organizations Malteser  
163 international and VZW Aketi, decentralized community-based programs were implemented to provide anti-  
164 epileptic drugs to PWE in the study sites.

165

166 **Results**

167 **PWE in the Logo Health Zone**

168 A total of 420 PWE in the Logo health zone were enrolled in the study between October 2017 and July  
169 2018. Their ages ranged from 1 – 72 years. Skin snip data was available for 392 (93.3%) of participants; of  
170 these, 143 (36.5%) were positive. The median mf density was 0.0 (IQR: 0.0 – 9.6 mf/skin snip), range 0.0  
171 – 384.5 mf/skin snip. More than 90% of participants had not gone beyond primary education (Table 1).

172 **Table 1.** Sociodemographic characteristics of PWE in the Logo Health Zone

|                            | <b>All PWE<br/>N = 420</b> | <b>Skin snip negative<br/>n = 249</b> | <b>Skin snip positive<br/>n = 143</b> | <b>P-value</b> |
|----------------------------|----------------------------|---------------------------------------|---------------------------------------|----------------|
| Median age in years (IQR)  | 19.0 (14.0 – 29.0)         | 18.0 (13.0 – 29.0)                    | 23.0 (18.0 – 31.0)                    | < 0.001        |
| <b>Gender</b>              |                            |                                       |                                       | 0.776          |
| Number of males (%)        | 218 (51.9%)                | 129 (51.8%)                           | 72 (50.3%)                            |                |
| Number of females (%)      | 202 (48.1%)                | 120 (48.2%)                           | 71 (49.7%)                            |                |
| <b>Level of education*</b> |                            |                                       |                                       | 0.263          |
| None (%)                   | 155 (37.5%)                | 85 (35.0%)                            | 49 (34.5%)                            |                |
| Primary (%)                | 218 (52.8%)                | 129 (53.1%)                           | 84 (59.2%)                            |                |
| Secondary (%)              | 39 (9.4%)                  | 28 (11.5%)                            | 9 (6.34%)                             |                |
| University (%)             | 1 (0.2%)                   | 1 (0.41%)                             | 0 (0%)                                |                |

\*7 missing values

IQR: Interquartile range

173



174 Epilepsy duration ranged from 0 – 53 years, with a median of 7 years (IQR: 3 – 14). In 51 (12.3%)  
 175 participants, the duration of epilepsy was  $\leq$  1 year (new cases of epilepsy). The median age for epilepsy  
 176 onset was 11 years (IQR: 6.3 – 16.0), with 308 (73.3%) experiencing the first epileptic seizure between 3  
 177 – 18 years (Fig 1).

178 **Fig 1.** Ages of participants at seizure onset

179 Generalized motor seizures were reported in 392 (93.3%) PWE, and included 388 (92.1%) with generalized  
 180 tonic-clonic seizures, 2 (0.5%) generalized myoclonic seizures, 2 (0.5%) generalized atonic seizures (“drop  
 181 attacks”), and 1 (0.2%) generalized tonic seizures. Nodding seizures were reported in 32 (7.6%)  
 182 participants. One hundred and sixty-five (39.3%) PWE experienced more than one seizure type. Table 2  
 183 summarizes the clinical presentations of participants in the Logo health zone, stratified by skin snip status;  
 184 the denominators may vary for the different parameters because PWE with missing data were excluded.

185 **Table 2:** Clinical presentations of PWE in the Logo health zone

|                                                            | All PWE<br>N = 420 | Skin snip negative<br>n = 249 | Skin snip positive<br>n = 143 | P-value |
|------------------------------------------------------------|--------------------|-------------------------------|-------------------------------|---------|
| <b>Anthropometric characteristics</b>                      |                    |                               |                               |         |
| Growth retardation (%)                                     | 122/386 (31.6%)    | 71/216 (32.9%)                | 41/142 (28.9%)                | 0.425   |
| <b>Seizure characteristics</b>                             |                    |                               |                               |         |
| Seizure frequency per month (IQR)                          | 2.0 (0.5 – 3.0)    | 2.0 (0.3 – 3.0)               | 2.0 (1.0 – 4.0)               | <0.001  |
| Age at seizure onset in years (IQR)*                       | 11.0 (6.3 – 6.0)   | 10.0 (6.0 – 15.2)             | 13.0 (9.0 – 17.0)             | 0.001   |
| Epilepsy duration in years (IQR)*                          | 7.0 (3.0 – 14.0)   | 7.0 (4.0 – 12.6)              | 10.0 (3.0 – 16.8)             | 0.052   |
| Generalized motor seizures (%)                             | 392/420 (93.3%)    | 227/248 (91.5%)               | 138/143 (96.5%)               | 0.057   |
| Absence seizures (%)                                       | 168/420 (40.0%)    | 101/248 (40.7%)               | 62/143 (43.4%)                | 0.603   |
| Nodding seizures (%)                                       | 32/420 (7.6%)      | 16/248 (6.5%)                 | 14/142 (9.9%)                 | 0.223   |
| Focal motor seizures, conserved awareness (%)              | 8/386 (2.1%)       | 3/216 (1.4%)                  | 5/142 (3.5%)                  | 0.189   |
| Focal motor seizures, reduced awareness (%)                | 34/386 (8.8%)      | 17/216 (7.9%)                 | 16/142 (11.3%)                | 0.278   |
| Focal to bilateral tonic-clonic seizures (%)               | 22/359 (6.1%)      | 13/217 (6.0%)                 | 9/142 (6.3%)                  | 0.908   |
| Focal non-motor seizures, mainly visual hallucinations (%) | 74/349 (21.2%)     | 47/224 (21.0%)                | 27/125 (21.6%)                | 0.896   |

|                                         |                 |                 |                 |         |
|-----------------------------------------|-----------------|-----------------|-----------------|---------|
| Unclassified seizures (%)               | 1/358 (0.3%)    | 1/216 (0.5%)    | 0/142 (0%)      | NA      |
| <b>Clinical and laboratory findings</b> |                 |                 |                 |         |
| Itching (%)                             | 141/414 (34.1%) | 83/245 (33.9%)  | 57/142 (40.1%)  | 0.222   |
| Palpable nodules (%)                    | 24/406 (5.9%)   | 8/236 (3.4%)    | 14/143 (9.8%)   | 0.010   |
| Burn scars (%)                          | 98/417 (23.5%)  | 60/249 (24.1%)  | 38/142 (26.8%)  | 0.554   |
| Cognitive impairment (%)                | 143/415 (34.5%) | 87/245 (35.5%)  | 48/143 (33.6%)  | 0.705   |
| Abnormal behaviour (%)                  | 47/120 (39.2%)  | 27/69 (39.1%)   | 18/47 (38.3%)   | 0.931   |
| Spinal/thoracic deformity               | 5/385 (13.0%)   | 2/216 (0.9%)    | 3/142 (2.1%)    | 0.341   |
| Nakalanga features**                    | 12/386 (3.1%)   | 7/216 (3.2%)    | 5/142 (3.5%)    | 0.877   |
| Positive Ov16 rapid test result         | 127/362 (35.1%) | 49/211 (23.2%)  | 76/123 (61.8%)  | < 0.001 |
| OAE criteria met [7]                    | 284/420 (67.6%) | 165/249 (66.3%) | 110/143 (76.9%) | 0.027   |

\*2 missing data

\*\*Growth retardation, delayed sexual development, cognitive impairment, and/or deformities [19]

IQR: Interquartile range; OAE: Onchocerciasis-associated epilepsy; NA: Not available

186

187 Among the 284 PWE (67.6%) who met the OAE diagnostic criteria, 110/275 (40.0%) and 99/150 (39.8%)  
 188 were positive for skin snips and Ov16 rapid tests, respectively. Only 258 of these OAE participants had  
 189 complete data for both Ov16 and skin snip results, and 147 (57.0%) of them were positive for at least one  
 190 onchocerciasis test. Seizure frequency was higher among PWE who met the OAE criteria: 2.0  
 191 seizures/month (IQR: 0.7 – 4.0), compared to 1.5 seizures/month (IQR: 0.5 – 2.0) in PWE who did not meet  
 192 the criteria;  $p = 0.006$  (Wilcoxon rank sum test). Moreover, a higher mf density was observed among the  
 193 PWE who fulfilled the OAE criteria: 0.0 mf/skin snip (IQR: 0.0 – 16.0) vs 0.0 mf/skin snip (IQR: 0.0 –  
 194 1.5);  $p = 0.02$ .

195 When considering all PWE in the Logo health zone, PWE who were positive for at least one onchocerciasis  
 196 laboratory test (Ov16 test or skin snip) were older (median age: 23.0 years, IQR: 18.0 – 31.0 vs 17.0 years,  
 197 IQR: 12.0 – 26.8;  $p < 0.001$ ); had a higher seizure frequency (2 seizures/month, IQR: 0.8 – 4.0 vs 2  
 198 seizures/month, IQR: 0.3 – 2.0;  $p = 0.003$ ); more absence seizures (42.8% vs 27.8%,  $p = 0.003$ ); more  
 199 itching (41.5% vs 30.2%,  $p = 0.028$ ); more traumatic wounds/burns (29.5% vs 19.1%;  $p = 0.024$ ); and more

200 family history of epilepsy (41.2% vs 30.2%;  $p = 0.032$ ) when compared with PWE who were negative for  
201 both tests.

202 Nodding seizures were reported in 32 (7.6%) PWE. When compared with PWE without a history of nodding  
203 seizures, PWE with nodding seizures were younger (median ages: 16.0 years (IQR: 13.0 – 19.0) vs 20.0  
204 years (IQR: 14.2 – 29.0);  $p = 0.01$ ), had a higher seizure frequency (3.0 seizures/month (IQR: 2.0 – 16.2)  
205 vs (2.0 seizures/month (IQR: 0.5 – 3.0);  $p < 0.001$ ), experienced absence seizures more frequently (75.0%  
206 vs 37.1%;  $p < 0.001$ ), were more often cognitively impaired (71.9% vs 31.2%;  $p < 0.001$ ), and had a higher  
207 prevalence of delayed secondary sexual development (11.1% vs 2.5%;  $p = 0.01$ ). Age at seizure onset was  
208 not significantly different among participants who reported nodding seizures (age at onset: 9.5 years; IQR:  
209 6.0 – 12.0) compared to those who did not (age at onset: 11.0 years; IQR: 7.0 – 17.0);  $p = 0.09$ .

210 Twelve PWE presented with Nakalanga features (Table 3), of which 4 (33.3%) were males. Their ages  
211 ranged from 16 – 30 years. In all the 11 PWE with Nakalanga features for whom the age of epilepsy onset  
212 was known, the first seizure occurred between 3 and 12 years; in one individual, the age at seizure onset  
213 was not known but a febrile seizure was reported at the age of one year. Seizure types included generalized  
214 tonic-clonic seizures in 11/12 (91.7%), absence seizures in 9/12 (75.0%), and nodding seizures in 3/12  
215 (25.0%). Seizure frequency ranged from 0.2 – 90.0 per month, and 11 of these PWE experienced two or  
216 more seizure types. Two thirds (8/12) of PWE presenting Nakalanga features were positive for at least one  
217 onchocerciasis test.

218 **Table 3:** Clinical features and onchocerciasis diagnosis in PWE with the Nakalanga features

| Case | Socio-demography |          | Anthropometry |                                     |                              | Seizure history |                                                                                |                     |                    | Other clinical manifestations |                                          |                             | OAE                       | Onchocerciasis diagnosis |                         |      |
|------|------------------|----------|---------------|-------------------------------------|------------------------------|-----------------|--------------------------------------------------------------------------------|---------------------|--------------------|-------------------------------|------------------------------------------|-----------------------------|---------------------------|--------------------------|-------------------------|------|
|      | Sex              | Age      | Height (cm)   | Height-for-age Z-score <sup>1</sup> | Summary                      | Age at onset    | Seizure types                                                                  | Frequency (monthly) | Epileptic siblings | Cognitive impairment          | Sexual development                       | Deformity                   | Criteria met <sup>2</sup> | Number of nodules        | Mf density <sup>3</sup> | Ov16 |
| 1    | Female           | 16 years | 145           | -2.6                                | Moderate stunting            | 4 years         | Generalized tonic clonic; Absence; focal sensory                               | 12                  | 0                  | No                            | Mature breast<br>No pubic hair           | None                        | Yes                       | 0                        | 0                       | +    |
| 2    | Male             | 22 years | 140           | ND                                  | Below the mean adult height* | 8 years         | Generalized tonic clonic                                                       | 90                  | 2                  | Yes                           | No pubic hair                            | Lordosis; facial dysmorphia | Yes                       | 0                        | 155.5                   | +    |
| 3    | Female           | 18 years | 143           | -3.0                                | Severe stunting              | NA              | Generalized tonic clonic; Absence; focal sensory                               | 3                   | 1                  | Yes                           | Mature breast<br>No pubic hair           | None                        | No                        | 2                        | 159.5                   | -    |
| 4    | Male             | 18 years | 144           | -4.3                                | Severe stunting              | 12 years        | Nodding; Absence                                                               | 3                   | 0                  | Yes                           | No pubic hair                            | None                        | Yes                       | 0                        | 0                       | +    |
| 5    | Female           | 30 years | 136           | ND                                  | Below the mean adult height* | 5 years         | Generalized tonic clonic; Absence; Nodding; focal sensory                      | 0.2                 | 0                  | Yes                           | Mature breast<br>Pubic hair present      | None                        | Yes                       | 0                        | 0                       | -    |
| 6    | Male             | 29 years | 137           | ND                                  | Below the mean adult height* | 12 years        | Generalized tonic clonic                                                       | 3                   | 0                  | Yes                           | No pubic hair                            | Kyphosis, facial dysmorphia | Yes                       | 0                        | 0                       | -    |
| 7    | Female           | 19 years | 136           | -4.2                                | Severe stunting              | 5 years         | Generalized tonic clonic; Absence                                              | 3                   | 2                  | No                            | Immature breast<br>No pubic hair         | None                        | Yes                       | 0                        | 27.5                    | NA   |
| 8    | Female           | 19 years | 152           | -1.7                                | Low height, not stunted      | 7 years         | Generalized tonic clonic; Absence                                              | 5                   | 0                  | Yes                           | Mature breast<br>Pubic hair present      | None                        | Yes                       | 0                        | 0                       | -    |
| 9    | Female           | 19 years | 142           | -3.2                                | Severe stunting              | 8 years         | Generalized tonic clonic; Absence; Nodding; focal seizure + impaired awareness | 15                  | 0                  | Yes                           | Mature breast<br>No pubic hair           | Kyphosis                    | Yes                       | 0                        | 0.5                     | -    |
| 10   | Male             | 24 years | 155           | ND                                  | Below the mean adult height* | 8 years         | Generalized tonic clonic; Absence; focal sensory                               | 15                  | 0                  | Yes                           | No pubic hair                            | Thoracic deformity          | Yes                       | 1                        | 126.5                   | NA   |
| 11   | Female           | 19 years | 150           | -2.1                                | Moderate stunting            | 3 years         | Generalized tonic clonic; Absence                                              | 16                  | 2                  | Yes                           | Mature breast<br>Pubic hair present      | None                        | Yes                       | 0                        | 0                       | +    |
| 12   | Female           | 27 years | 145           | ND                                  | Below the mean adult height* | 5 years         | Generalized tonic clonic                                                       | 2                   | 0                  | Yes                           | Mature breast<br>Pubic hair not examined | None                        | Yes                       | 0                        | 0                       | -    |

<sup>1</sup>For participants aged 5 – 19 years, based on the World Health Organization growth curves [13]

<sup>2</sup>Based on previously published criteria [7]

<sup>3</sup>Number of microfilariae per skin snip

\*Mean height of a female adult in the Democratic Republic of Congo: 157.4 cm [14]

Mf: microfilaria; NA: Not available; ND: Not done; OAE: Onchocerciasis-associated epilepsy

219

220

221 Table 4 summarizes the past history of PWE in the Logo health zone. Overall, 136 probable neurological  
 222 events during childhood were reported, of which 62 (45.6% of the events) were seizures with fever. Of the  
 223 288 PWE who reported ever taking anti-epileptic drugs (AED), the molecules used included: phenytoin (91  
 224 PWE, 31.6%), phenobarbital (13 PWE, 4.5%) and carbamazepine (1 PWE, 0.3%). The remaining  
 225 participants could not recall the name of the AED used. Compared to their counterparts with no other PWE  
 226 among their first degree relatives, participants with a family history of epilepsy had more positive skin snips  
 227 (44.1% vs 32.9%;  $p = 0.027$ ) and higher mf densities (0 mf/skin snip, IQR: 0 – 29 vs 0 mf/skin snip, IQR:  
 228 0 – 3;  $p = 0.007$ ).

229 **Table 4.** Past history of PWE in the Logo Health Zone

|                                        | All PWE<br>N = 420 | Skin snip negative<br>n = 249 | Skin snip positive<br>n = 143 | P-value |
|----------------------------------------|--------------------|-------------------------------|-------------------------------|---------|
| Head trauma with loss of consciousness | 6/413 (1.5%)       | 6/246 (2.4%)                  | 0/139 (0%)                    | NA      |
| Probable perinatal asphyxia*           | 20/380 (5.3%)      | 11/233 (4.7%)                 | 5/132 (3.8%)                  | 0.687   |
| Meningitis/encephalitis                | 4/412 (1.0%)       | 4/246 (1.6%)                  | 0/138 (0%)                    | NA      |
| Malaria                                | 38/384 (9.9%)      | 27/245 (11.0%)                | 11/139 (7.9%)                 | 0.389   |
| Measles                                | 6/350 (1.7%)       | 5/212 (2.4%)                  | 1/138 (0.7%)                  | 0.234   |
| Seizure with fever in childhood        | 62/380 (16.3%)     | 38/234 (16.2%)                | 16/120 (13.3%)                | 0.473   |
| Ever used anti-epileptic drugs         | 288/418 (68.9%)    | 171/248 (69.0%)               | 94/143 (65.7%)                | 0.502   |
| Ever used traditional medicine         | 167/385 (43.4%)    | 99/215 (46.0%)                | 59/142 (41.5%)                | 0.403   |
| Family history of epilepsy**           | 151/420 (36.0%)    | 82/249 (32.9%)                | 63/143 (44.1%)                | 0.027   |

\*Difficult labor and/or birth by emergency caesarean section

\*\*Epilepsy in a first degree relative, either parent or sibling

NA: Not available

230

231 Different seizure triggers were identified, including food, cold weather, and storms (Fig 2). Eight of the  
 232 nine PWE (88.9%) who reported food as a trigger were experiencing nodding seizures.

233 **Fig 2.** Seizure triggers among PWE in the Logo Health Zone

234 Bivariate analysis showed a positive correlation between seizure frequency and mf density among PWE in  
235 the Logo health zone: Spearman rho = 0.181; p = 0.0003 (Fig 3A). The multivariable analysis revealed that  
236 female gender, age, mf density, history of nodding seizures, behavioural abnormalities, deformities, growth  
237 retardation and reduced autonomy were associated with the high seizure frequency in the study participants  
238 (Table 5). In contrast, epilepsy duration, absence seizures, burn scars, previous AED use and cognitive  
239 impairment had a negative association with seizure frequency.

240 **Table 5.** Multivariable analysis for factors associated with seizure frequency in the Logo Health Zone

| Covariate                 | Risk Ratio | 95% confidence interval | P-value |
|---------------------------|------------|-------------------------|---------|
| Female gender             | 2.163      | 1.708 – 2.747           | < 0.001 |
| Age                       | 1.043      | 1.032 – 1.054           | < 0.001 |
| Duration of epilepsy      | 0.948      | 0.928 – 0.968           | < 0.001 |
| Mf density                | 1.004      | 1.002 – 1.007           | < 0.001 |
| Nodding seizures          | 3.852      | 2.926 – 5.082           | < 0.001 |
| Absence seizures          | 0.723      | 0.557 – 0.936           | 0.01    |
| Head trauma               | 0.310      | 0.005 – 2.081           | 1       |
| Previous AED use          | 0.579      | 0.432 – 0.774           | < 0.001 |
| Cognitive impairment      | 0.046      | 0.027 – 0.077           | < 0.001 |
| Abnormal behaviour        | 1.867      | 1.425 – 2.441           | < 0.001 |
| Reduced autonomy          | 2.749      | 1.688 – 4.738           | < 0.001 |
| Burn scars                | 0.620      | 0.460 – 0.831           | 0.001   |
| History of malaria        | 1.078      | 0.787 – 1.466           | 1       |
| Growth retardation        | 2.678      | 1.919 – 3.758           | < 0.001 |
| Spinal/thoracic deformity | 2.001      | 1.121 – 3.412           | 0.01    |

*Mf: Microfilariae; AED: Anti-epileptic drug*

241

242

### 243 **PWE in the Aketi Health Zone**

244 All 81 PWE recruited in the Aketi health zone had positive skin snips. Their median age was 17 years (IQR:  
245 15 – 20) and the median mf density was 10.5 mf/skin snip (IQR = 3.5 – 53.0). Forty-one (50.6%) were  
246 males. The median seizure frequency was 1.0 seizure/month (IQR: 0.5 – 2.0). CDTI coverage among the

247 participants in the year prior to the study was 50/81 (61.7%). Bivariate analyses showed a positive  
248 correlation between seizure frequency and mf density, albeit a borderline significance (Spearman rho:  
249 0.228,  $p = 0.046$ ; Fig 3B). After adjusting for age, sex, previous AED and ivermectin use, the seizure  
250 frequency of participants was still associated with mf density (RR = 1.0065, 95% confidence interval:  
251 1.0057 – 1.0073;  $p < 0.001$ ). Of note, previous ivermectin use was associated with reduced seizure  
252 frequency (RR = 0.69, 95% confidence interval: 0.58 – 0.83;  $p < 0.001$ ).

253 **Fig 3.** Correlation between frequency of seizures and microfilarial density among PWE

254  
255 When comparing the intensity of *O. volvulus* infection among PWE in the Logo and Aketi health zones, we  
256 found that the median mf densities from skin snip-positive participants in both sites differed significantly  
257 (Logo: 27.5 mf/skin snip vs Aketi: 10.5 mf/skin snip;  $p = 0.01$ ).

258

## 259 **Discussion**

260 This is the first paper describing the clinical characteristics of epilepsy and its relationship with microfilarial  
261 density in onchocerciasis-endemic areas in the DRC. A wide spectrum of seizures was observed, with more  
262 than one third of participants reporting at least two seizure types. The most frequently reported seizures  
263 were generalized motor seizures (93.3%), followed by absences (40.0%). Nodding seizures and Nakalanga  
264 features were reported, suggesting a high prevalence of OAE in these communities as previously observed  
265 in Ituri (DRC) [9], in the Mbam valley (Cameroon) [20], Mahenge (Tanzania) [21], and Maridi (South  
266 Sudan) [22]. Moreover, two thirds of participants in the Logo health zone met the OAE criteria. A positive  
267 correlation between the frequency of seizures and mf density supports recent findings from a cohort study  
268 in Cameroon which showed that the risk to develop epilepsy increases with increasing intensity of  
269 childhood infection with *O. volvulus* [5]. In that cohort study, the population attributable fraction of epilepsy  
270 associated with onchocerciasis was estimated at 91.7% [5], and PWE in the investigated villages had similar  
271 clinical manifestations as observed in our study [23].

272 By meticulously taking the history of our study participants, we were able to identify 32 PWE who reported  
273 experiencing nodding seizures. They all met the criteria of the consensual case definition of probable  
274 nodding syndrome [24]. Persons with a history of nodding seizures in our study were younger, more often  
275 cognitively impaired and had more food-triggered seizures; all these clinical aspects align with the nodding  
276 syndrome definition [24]. In addition, the description of the 12 PWE with Nakalanga features presented in  
277 Table 3 closely matched previous reports from other African countries [19]. The fact that these phenotypic  
278 presentations have only been reported in onchocerciasis-endemic settings till date strongly suggests the role  
279 of *O. volvulus* in triggering these conditions.

280 An unexpected finding from our multivariable model was the negative association between seizure  
281 frequency and cognitive impairment. This could be related to the natural history of the nodding syndrome,  
282 as it usually begins at a younger age with frequent, debilitating nodding seizures, which generally evolve  
283 to less frequent generalized convulsive seizures [25]. This is confirmed by the reduction in seizure  
284 frequency observed with increasing duration of epilepsy. It is therefore conceivable that some PWE were  
285 already cognitively impaired because of past nodding seizures, though presenting with fewer generalized  
286 convulsions at the time of the study. Persons with cognitive impairment and high seizure frequency are also  
287 likely to have a reduced life expectancy and therefore were not very prevalent in the study population. A  
288 similar explanation may hold true for participants with burn scars.

289 In our study, head trauma was not associated with seizure frequency in contrast with previous findings from  
290 Ethiopia [18]. Other factors associated with high seizure frequency such as behavioral symptoms and  
291 reduced autonomy are probably co-morbid conditions resulting from recurrent seizures. The fact that the  
292 female gender was associated with two times more seizures compared to the male gender in our study  
293 warrants further research. Absence seizures may have been underestimated, explaining their negative  
294 association with the overall seizure frequency.

295 Growth retardation was a very frequent trait among PWE in the Logo health zone, irrespective of skin snip  
296 status. However, our multivariable model showed that growth retardation and mf density are each  
297 associated with increased seizure frequency. This complements previous suspicions from a recent study in



298 the DRC, that both epilepsy and retarded growth may be related to *O. volvulus* exposure [26]. Although  
299 stunting is a common feature in persons with OAE including nodding syndrome [7,23,26], other factors  
300 such as undernutrition and poverty observed among PWE may contribute to their abnormal growth, as  
301 reported in an Ethiopian study [27]. However, given that we did not investigate the feeding habits of our  
302 participants, our study is unable to confirm this.

303 Participants with a family history of epilepsy had a higher prevalence and intensity of *O. volvulus* infection.  
304 This suggests a greater exposure to onchocerciasis and explains the clustering of PWE in such households,  
305 which is a characteristic feature of OAE [7]. This is in line with previous reports of villages and families  
306 who are closer to blackfly breeding sites having more PWE [3,11,20,22].

307 Only skin snip-positive PWE were recruited in the Aketi health zone. However, their mf densities were  
308 much lower compared to skin-snip positive PWE in the Logo health zone. This is most probably due to 14  
309 rounds of CDTI that had already taken place in Aketi, while the participants from Logo were ivermectin-  
310 naïve. Up to 61.7% of PWE in Aketi had received ivermectin in the year preceding the study, much higher  
311 than the 25% CDTI coverage observed among PWE in onchocerciasis-endemic areas in Cameroon [23];  $p$   
312  $< 0.001$ . The belief that ivermectin may help to reduce epilepsy is frequent in the Aketi health zone [10]  
313 and this probably motivates PWE to adhere to CDTI.

314 While this was not the purpose of the study, we noted some discrepancies in the onchocerciasis diagnosis  
315 using skin snips (reference technique in our study) and Ov16 rapid tests (Table 2); the rapid tests yielded  
316 23.2% of false positives. Rapid tests may therefore not be optimal for diagnosing ongoing *O. volvulus*  
317 infection, although they do provide information about exposure to the parasite. They however remain key  
318 and convenient for field use when assessing onchocerciasis transmission by testing children aged 10 years  
319 and below, as was the case in Cameroon [20], Nigeria [28], DRC [10] and Tanzania [21].

## 320 **Limitations of the study**

321 Our study has several limitations. Laboratory and imaging investigations to exclude other possible causes  
322 of epilepsy such as neurocysticercosis were not performed. However, previous studies had suggested that

323 *T. solium* infection is not prevalent in the Logo Health zone [4] and in the Bas-Uélé province [29]. In  
324 addition, the high proportion of PWE meeting the OAE criteria makes it unlikely for another infectious  
325 pathology to be the main reason behind the high epilepsy prevalence. Another limitation is the fact that  
326 seizure information and past history of participants were obtained by questioning the PWE and caretakers,  
327 and could be subject to recall bias. Absence seizures and some focal seizures which are more subtle may  
328 have been under-reported as a consequence.

329 In conclusion, PWE in onchocerciasis-endemic villages in the Logo Health zone presented with wide  
330 clinical spectrum including generalized seizures, nodding seizures, Nakalanga features and other OAE  
331 characteristics. Mf density was significantly and positively associated with seizure frequency in both Logo  
332 and Aketi. It is expedient that onchocerciasis control measures be strengthened to prevent new OAE cases,  
333 while providing comprehensive care to confirmed PWE using appropriate AED and cognitive rehabilitation  
334 services. The possible added value of anti-filarial drugs in the treatment of OAE including nodding  
335 syndrome is currently being investigated [12,30].

## 336 **Acknowledgements**

337 We are grateful to Malteser International and VZW Aketi for organizing the treatment of PWE in the  
338 Logo and Aketi health zones, respectively. We appreciate all local health and community workers taking  
339 care of the PWE, and all the participants in the study. Thanks to the 6<sup>th</sup> EBQ Cohort (Global Health  
340 Institute, University of Antwerp, 2018) for statistical training and assistance in the initial data analyses.

341

## 342 **References**

- 343 1. Casis SG. El síndrome epileptico y sus relaciones con la Oncocercosis. Boletín Salubr E Hig Mex.  
344 1938;1: 11–31.
- 345 2. Pion SD, Kaiser C, Boutros-Toni F, Cournil A, Taylor MM, Meredith SEO, et al. Epilepsy in  
346 Onchocerciasis Endemic Areas: Systematic Review and Meta-analysis of Population-Based  
347 Surveys. PLoS Negl Trop Dis. 2009;3. doi:10.1371/journal.pntd.0000461
- 348 3. Boussinesq M, Pion SD, Ngangue D, Kamgno J. Relationship between onchocerciasis and epilepsy:  
349 a matched case-control study in the Mbam Valley, Republic of Cameroon. Trans R Soc Trop Med  
350 Hyg. 2002;96: 537–541.

- 351 4. Mandro M, Suykerbuyk P, Tepage F, Rossy D, Ngave F, Hasan MN, et al. Onchocerca volvulus as  
352 a risk factor for developing epilepsy in onchocerciasis endemic regions in the Democratic Republic  
353 of Congo: a case control study. *Infect Dis Poverty*. 2018;7. doi:10.1186/s40249-018-0465-9
- 354 5. Chesnais CB, Nana-Djeunga HC, Njamnshi AK, Lenou-Nanga CG, Boullé C, Bissek A-CZ-K, et al.  
355 The temporal relationship between onchocerciasis and epilepsy: a population-based cohort study.  
356 *Lancet Infect Dis*. 2018;18: 1278–1286. doi:10.1016/S1473-3099(18)30425-0
- 357 6. Ae-Ngibise K, Akpalu B, Ngugi AK, Akpalu A, Agbokey F, Adjei P, et al. Prevalence and risk  
358 factors for Active Convulsive Epilepsy in Kintampo, Ghana. *Pan Afr Med J*. 2015;21.  
359 doi:10.11604/pamj.2015.21.29.6084
- 360 7. Colebunders R, Siewe F, Hotterbeekx A. Onchocerciasis-Associated Epilepsy, an Additional  
361 Reason for Strengthening Onchocerciasis Elimination Programs. *Trends Parasitol*. 2018;34: 208–  
362 216. doi:10.1016/j.pt.2017.11.009
- 363 8. Levick B, Laudisoit A, Tepage F, Ensoy-Musoro C, Mandro M, Bonareri Osoro C, et al. High  
364 prevalence of epilepsy in onchocerciasis endemic regions in the Democratic Republic of the Congo.  
365 Fleury A, editor. *PLoS Negl Trop Dis*. 2017;11: e0005732. doi:10.1371/journal.pntd.0005732
- 366 9. Lenaerts E, Mandro M, Mukendi D, Suykerbuyk P, Dolo H, Wonya’Rossi D, et al. High prevalence  
367 of epilepsy in onchocerciasis endemic health areas in Democratic Republic of the Congo. *Infect Dis  
368 Poverty*. 2018;7. doi:10.1186/s40249-018-0452-1
- 369 10. Mukendi D, Tepage F, Akonda I, Siewe FJN, Rotsaert A, Ndibmun CN, et al. High prevalence of  
370 epilepsy in an onchocerciasis endemic health zone in the Democratic Republic of the Congo, despite  
371 14 years of community-directed treatment with ivermectin: A mixed-method assessment. *Int J Infect  
372 Dis*. 2019; doi:10.1016/j.ijid.2018.10.021
- 373 11. Colebunders R, Tepage F, Rood E, Mandro M, Abatih EN, Musinya G, et al. Prevalence of River  
374 Epilepsy in the Orientale Province in the Democratic Republic of the Congo. *PLoS Negl Trop Dis*.  
375 2016;10. doi:10.1371/journal.pntd.0004478
- 376 12. Colebunders R, Mandro M, Mukendi D, Dolo H, Suykerbuyk P, Van Oijen M. Ivermectin  
377 Treatment in Patients With Onchocerciasis-Associated Epilepsy: Protocol of a Randomized Clinical  
378 Trial. *JMIR Res Protoc*. 2017;6: e137. doi:10.2196/resprot.7186
- 379 13. de Onis M. Development of a WHO growth reference for school-aged children and adolescents.  
380 *Bull World Health Organ*. 2007;85: 660–667. doi:10.2471/BLT.07.043497
- 381 14. Garenne M. Trends in Nutritional Status of Adult Women in Sub-Saharan Africa [Internet]. USA:  
382 ICF Macro; 2011. Report No.: 27. Available: <https://dhsprogram.com/pubs/pdf/CR27/CR27.pdf>
- 383 15. Diagana M, Preux PM, Tuillas M, Ould Hamady A, Druet-Cabanac M. Dépistage de l’épilepsie en  
384 zones tropicales: validation d’un questionnaire en Mauritanie. *Bull Soc Pathol Exot* 1990. 2006;99:  
385 103–107.
- 386 16. Fisher RS, Acevedo C, Arzimanoglou A, Bogacz A, Cross JH, Elger CE, et al. ILAE Official  
387 Report: A practical clinical definition of epilepsy. *Epilepsia*. 2014;55: 475–482.  
388 doi:10.1111/epi.12550

- 389 17. Fisher RS, Cross JH, D'Souza C, French JA, Haut SR, Higurashi N, et al. Instruction manual for the  
390 ILAE 2017 operational classification of seizure types. *Epilepsia*. 2017;58: 531–542.  
391 doi:10.1111/epi.13671
- 392 18. Tigistu M, Azale T, Kebebe H, Yihunie T. Frequency of seizure attack and associated factors  
393 among patients with epilepsy at University of Gondar Referral Hospital: a cross-sectional study,  
394 Gondar, North West Ethiopia, 2017. *BMC Res Notes*. 2018;11. doi:10.1186/s13104-018-3761-3
- 395 19. Föger K, Gora-Stahlberg G, Sejvar J, Ovuga E, Jilek-Aall L, Schmutzhard E, et al. Nakalanga  
396 Syndrome: Clinical Characteristics, Potential Causes, and Its Relationship with Recently Described  
397 Nodding Syndrome. Ekpo UF, editor. *PLoS Negl Trop Dis*. 2017;11: e0005201.  
398 doi:10.1371/journal.pntd.0005201
- 399 20. Siewe Fodjo JN, Tatah G, Tabah EN, Ngarka L, Nfor LN, Chokote SE, et al. Epidemiology of  
400 onchocerciasis-associated epilepsy in the Mbam and Sanaga river valleys of Cameroon: impact of  
401 more than 13 years of ivermectin. *Infect Dis Poverty*. 2018;7. doi:10.1186/s40249-018-0497-1
- 402 21. Mmbando BP, Suykerbuyk P, Mnacho M, Kakorozya A, Matuja W, Hendy A, et al. High  
403 prevalence of epilepsy in two rural onchocerciasis endemic villages in the Mahenge area, Tanzania,  
404 after 20 years of community directed treatment with ivermectin. *Infect Dis Poverty*. 2018;7.  
405 doi:10.1186/s40249-018-0450-3
- 406 22. Colebunders R, Y Carter J, Olore PC, Puok K, Bhattacharyya S, Menon S, et al. High prevalence of  
407 onchocerciasis-associated epilepsy in villages in Maridi County, Republic of South Sudan: A  
408 community-based survey. *Seizure*. 2018;63: 93–101. doi:10.1016/j.seizure.2018.11.004
- 409 23. Siewe JFN, Ngarka L, Tatah G, Mengnjo MK, Nfor LN, Chokote ES, et al. Clinical presentations of  
410 onchocerciasis-associated epilepsy (OAE) in Cameroon. *Epilepsy Behav*. 2019;90: 70–78.  
411 doi:10.1016/j.yebeh.2018.11.008
- 412 24. World Health Organization. International Scientific meeting on Nodding Syndrome [Internet].  
413 Kampala, Uganda; 2012. Available:  
414 [http://www.who.int/neglected\\_diseases/diseases/Nodding\\_syndrom\\_Kampala\\_Report\\_2012.pdf](http://www.who.int/neglected_diseases/diseases/Nodding_syndrom_Kampala_Report_2012.pdf)
- 415 25. Idro R, Ogwang R, Kayongo E, Gumisiriza N, Lanyero A, Kakooza-Mwesige A, et al. The natural  
416 history of nodding syndrome. *Epileptic Disord*. 2018; 508–516. doi:10.1684/epd.2018.1012
- 417 26. Burfeind KG, Kashama J-MK, Bora BK, Murchison CF, Ramos-Crawford AL, Nseka MT, et al.  
418 Baseline characterization of epilepsy in an onchocerciasis endemic area of the Democratic Republic  
419 of Congo. *Brain Res Bull*. 2018; doi:10.1016/j.brainresbull.2018.11.009
- 420 27. Vaid N, Fekadu S, Alemu S, Dessie A, Wabe G, Phillips DIW, et al. Epilepsy, poverty and early  
421 under-nutrition in rural Ethiopia. *Seizure*. 2012;21: 734–739. doi:10.1016/j.seizure.2012.08.002
- 422 28. Siewe JNF, Ukaga CN, Nwazor EO, Nwoke MO, Nwokeji MC, Onuoha BC, et al. Low prevalence  
423 of epilepsy and onchocerciasis after more than 20 years of ivermectin treatment in the Imo River  
424 Basin in Nigeria. *Infect Dis Poverty*. 2019;8. doi:10.1186/s40249-019-0517-9
- 425 29. Colebunders R, Mandro M, Mokili JL, Mucinya G, Mambandu G, Pfarr K, et al. Risk factors for  
426 epilepsy in Bas-Uélé Province, Democratic Republic of the Congo: a case–control study. *Int J Infect*  
427 *Dis*. 2016;49: 1–8. doi:10.1016/j.ijid.2016.05.018

- 428 30. Anguzu R, Akun PR, Ogwang R, Shour AR, Sekibira R, Ningwa A, et al. Setting up a clinical trial  
429 for a novel disease: a case study of the Doxycycline for the Treatment of Nodding Syndrome Trial –  
430 challenges, enablers and lessons learned. Glob Health Action. 2018;11: 1431362.  
431 doi:10.1080/16549716.2018.1431362

432

## 433 **Supporting information**

434 **S1 File. STROBE checklist.**

435

Number of cases

100  
80  
60  
40  
20  
0

0 10 20 30 40 50 60

Age at seizure onset (years)

Figure

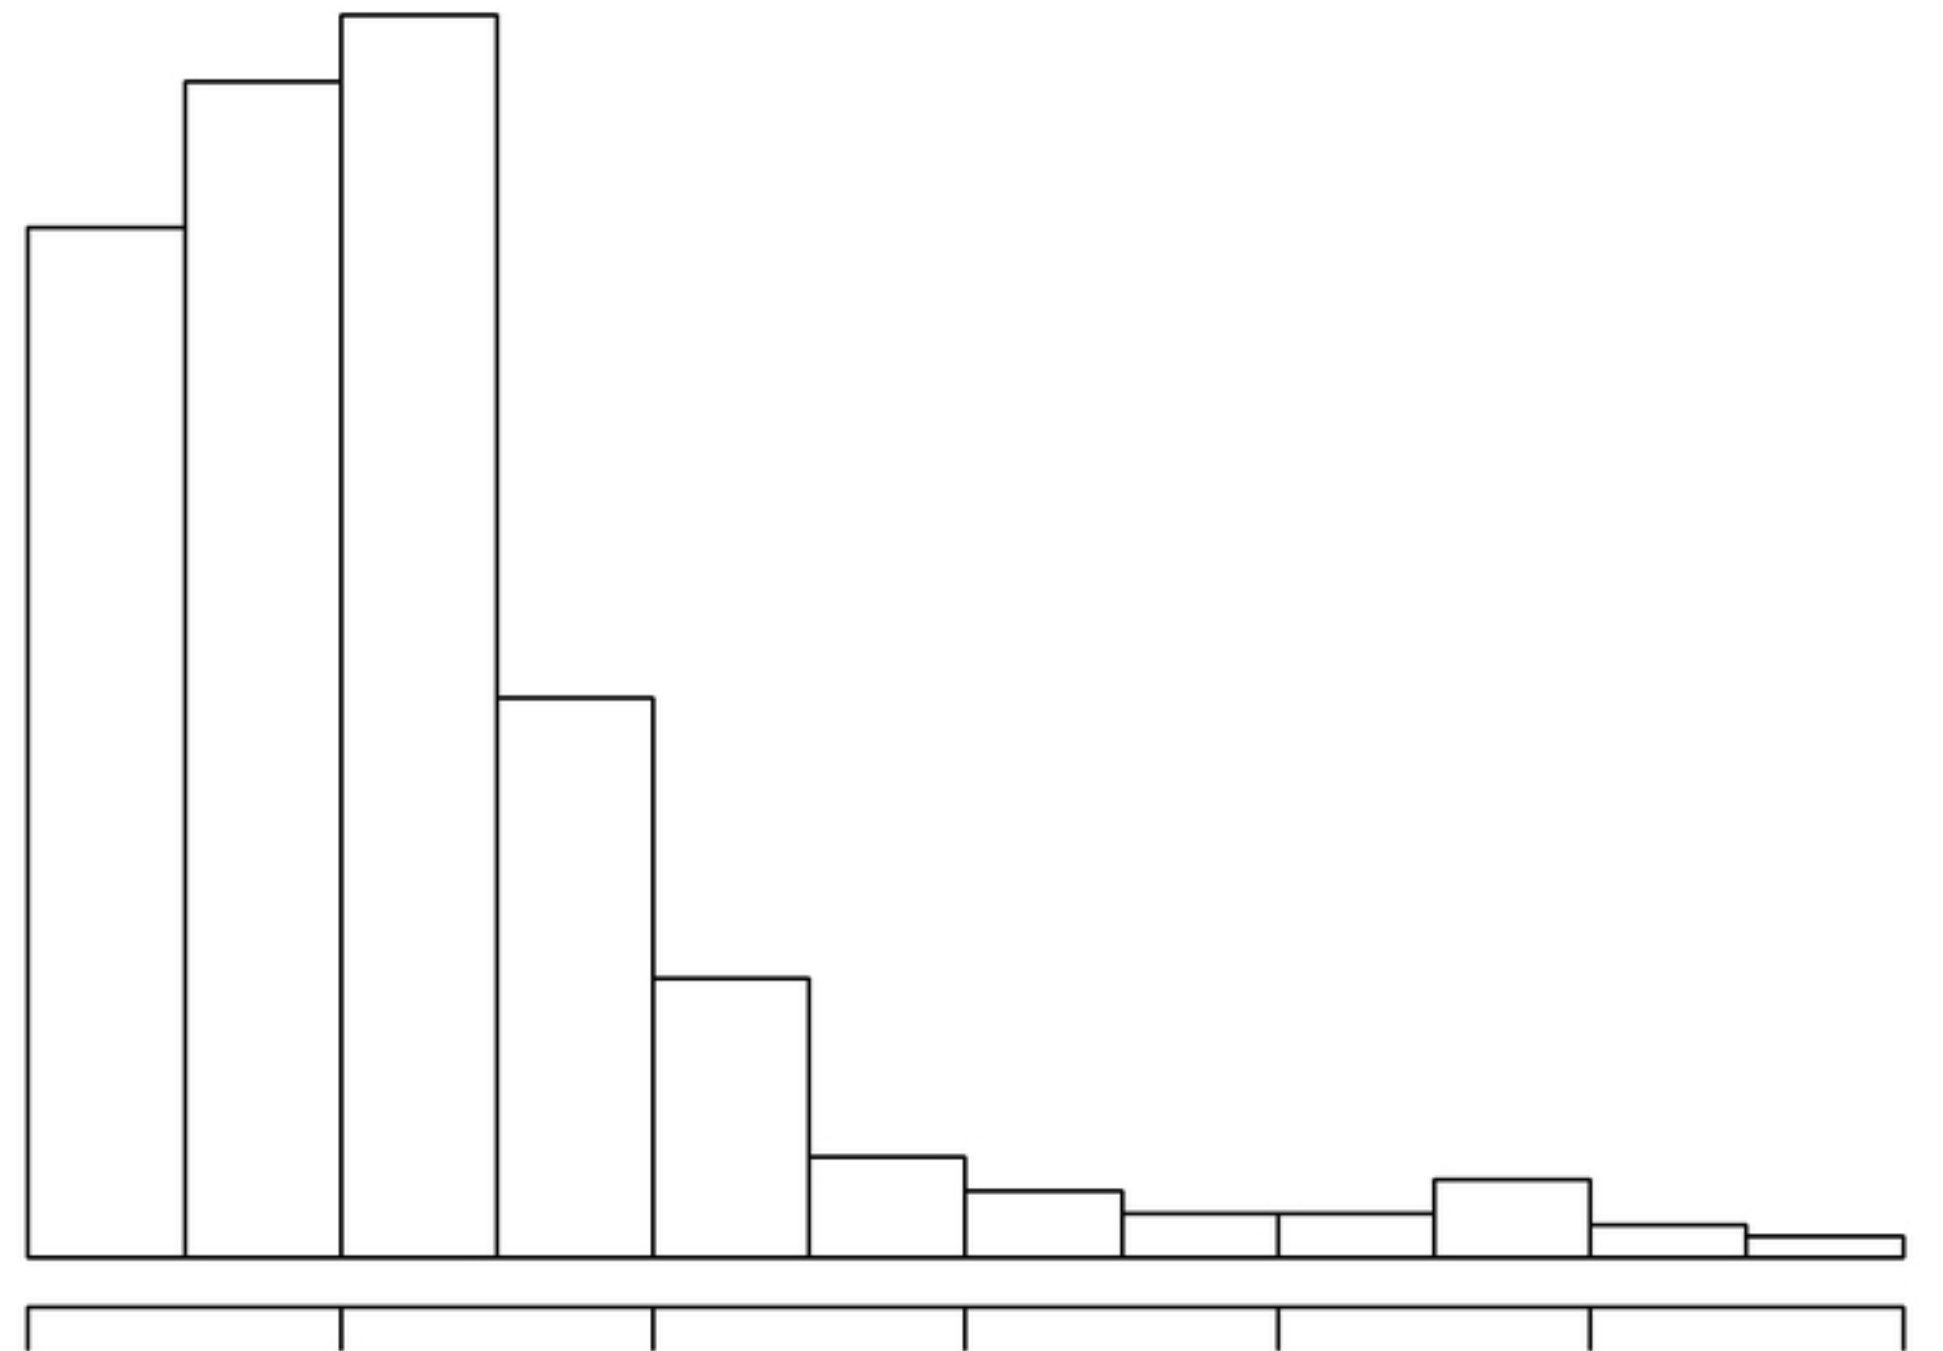

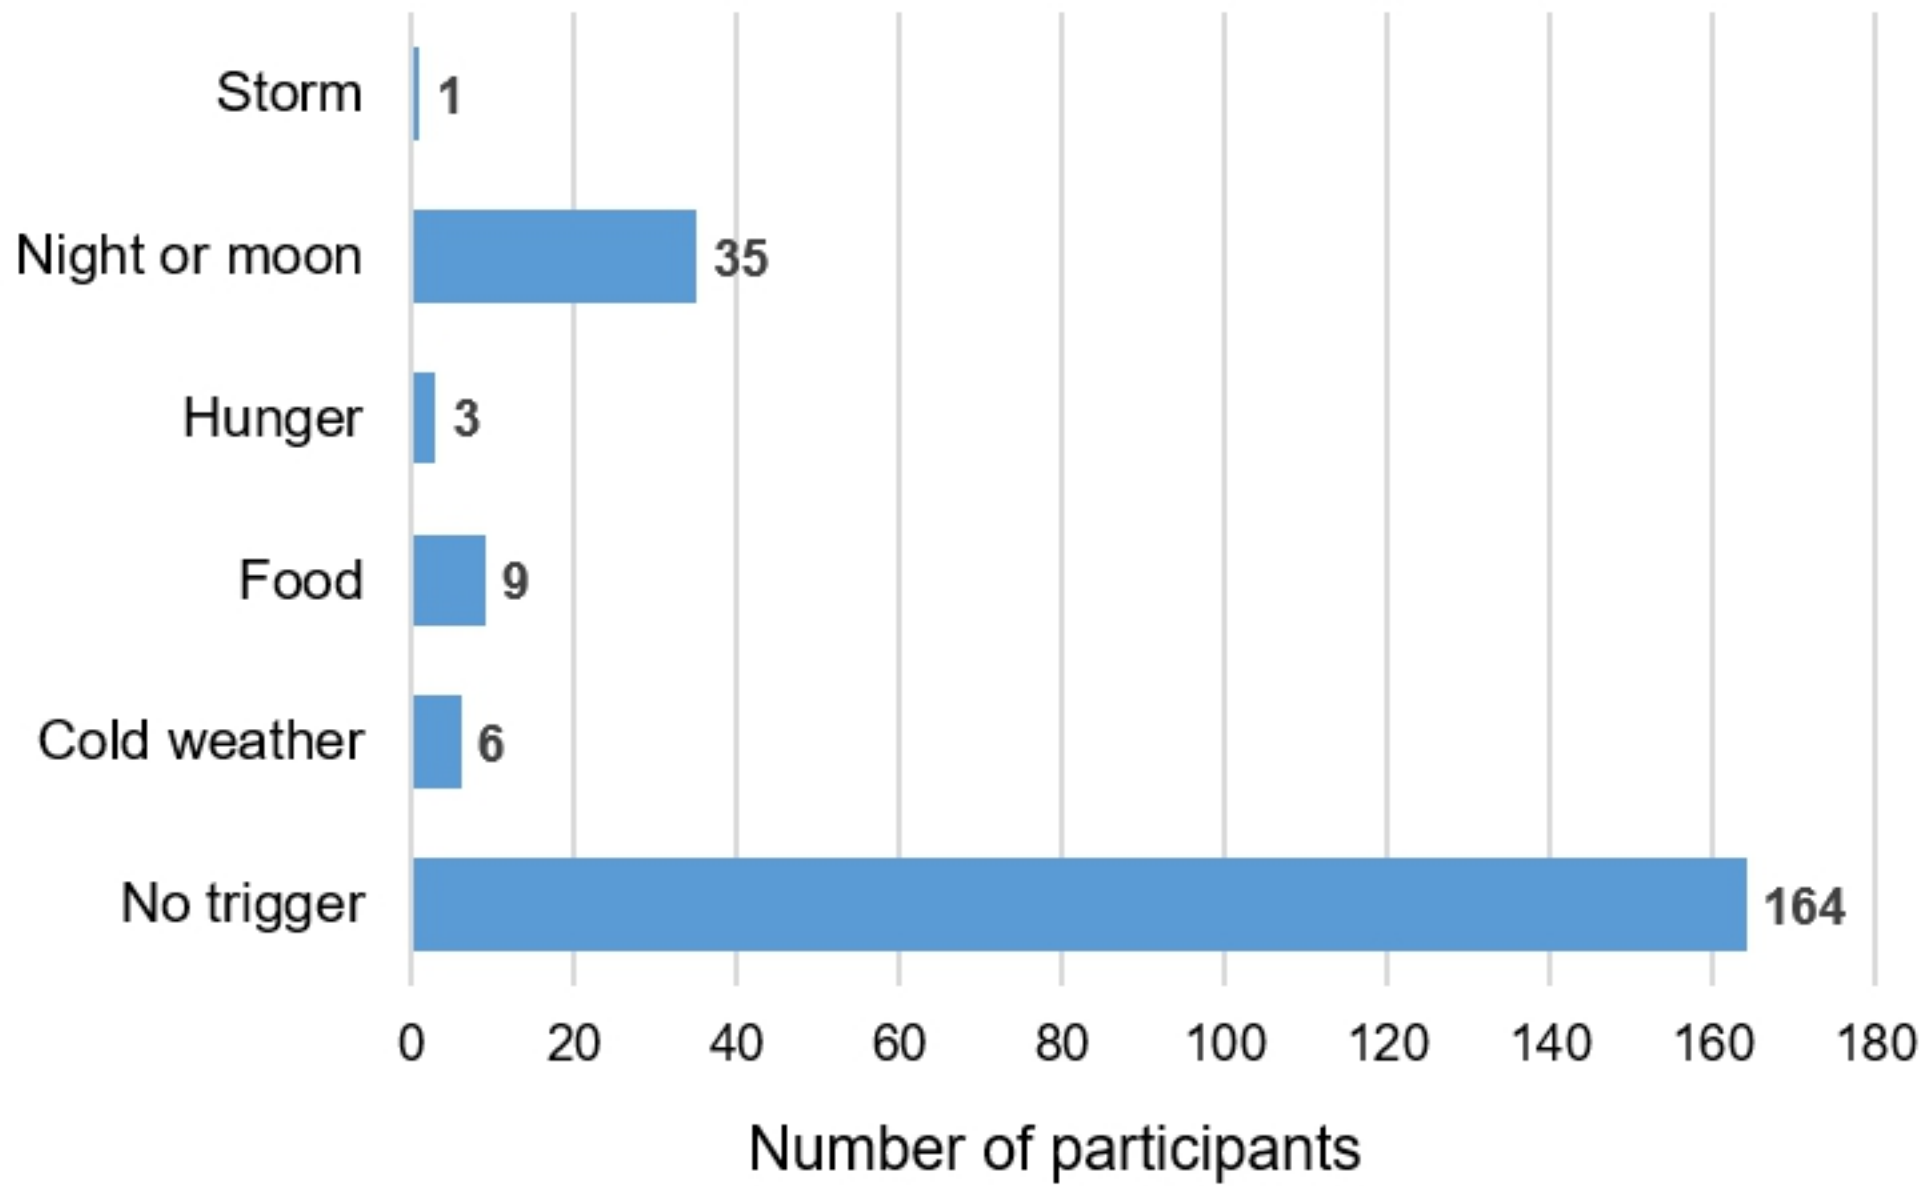

Figure

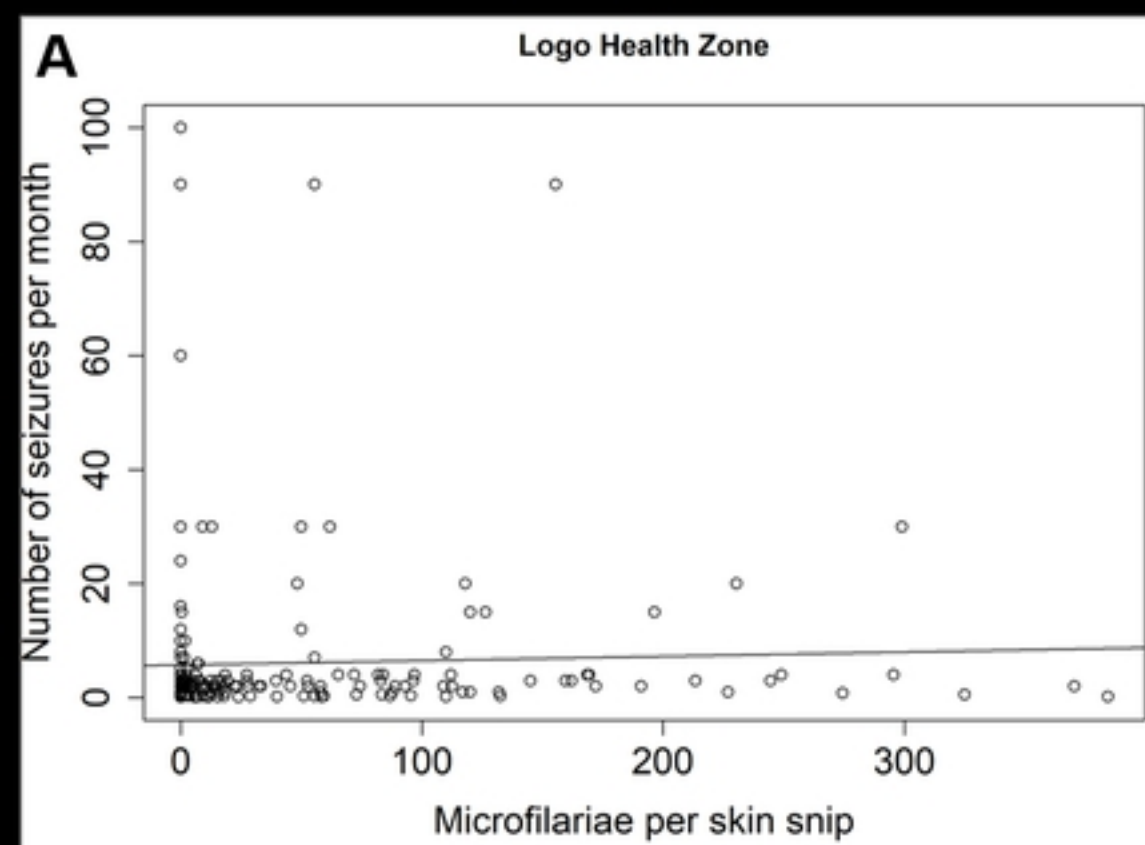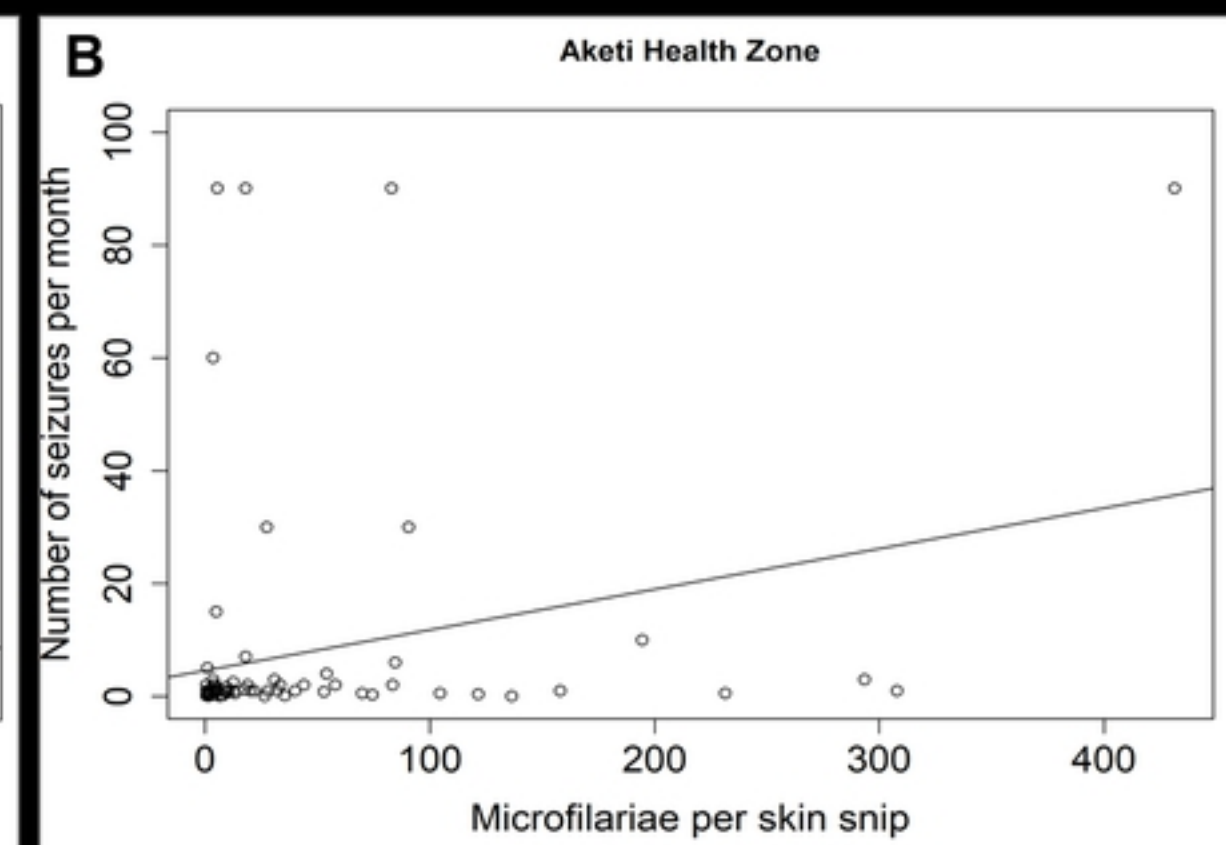

Figure
